# Supplementary material for: An argyrodite sulfide coated NCM cathode for improved interfacial contact in normal-pressure operational all-solid-state batteries
Source: Royal Society of Chemistry journal article supplement (doi:10.1039/d3ta03283c), 2023-01-01
Supplement: d3ta03283c1.pdf [file d3ta03283c1.pdf]

## Electronic Supplementary Information (ESI)

### Argyrodite sulfide coated NCM cathode for the improved interfacial contact in normal-pressure operational all-solid-state batteries

Jun Tae Kim,<sup>ab</sup> Hyeon-Ji Shin,<sup>ac</sup> A-yeon Kim,<sup>a</sup> Hyeon-Seong Oh,<sup>a</sup> Hun Kim,<sup>b</sup> Seungho Yu,<sup>a</sup> Hyoungchul Kim,<sup>d</sup> Kyung Yoon Chung,<sup>ac</sup> Jongsoon Kim,<sup>ef</sup> Yang-Kook Sun<sup>\*b</sup> and Hun-Gi Jung

<sup>\*acef</sup>

<sup>a</sup>Energy Storage Research Center, Korea Institution of Science and Technology, Seoul 02792, Republic of Korea.

<sup>b</sup>Department of Energy Engineering, Hanyang University, Seoul 04763, Republic of Korea.

<sup>c</sup>Division of Energy and Environment Technology, KIST School, Korea University of Science and Technology, Seoul 02792, Republic of Korea.

<sup>d</sup>Energy Materials Research Center, Korea Institution of Science and Technology, Seoul 02792, Republic of Korea.

<sup>e</sup>KIST-SKKU Carbon-Neutral Research Center, Sungkyunkwan University, Suwon 16419, Republic of Korea.

<sup>f</sup>Department of Energy Science, Sungkyunkwan University, Suwon 16419, Republic of Korea.

Corresponding Author

\*E-mail: yksun@hanyang.ac.kr (Y.-K. Sun), hungi@kist.re.kr (H.-G. Jung)

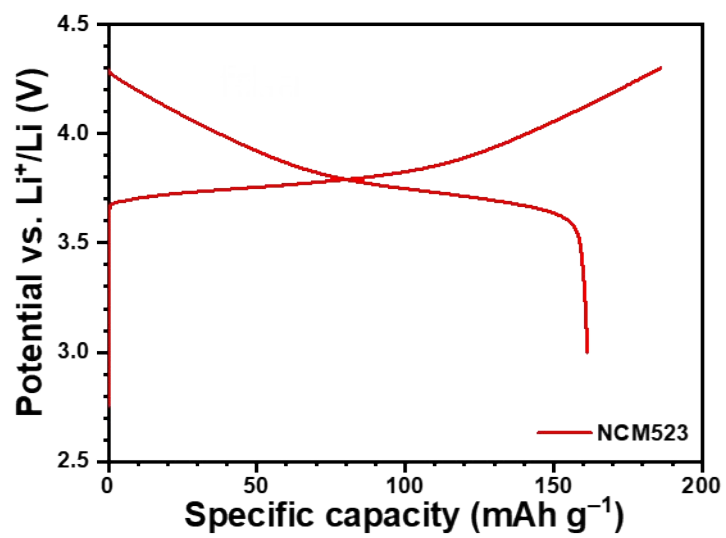

**Fig. S1** 1<sup>st</sup> charge–discharge voltage profile of NCM523 with liquid electrolyte.

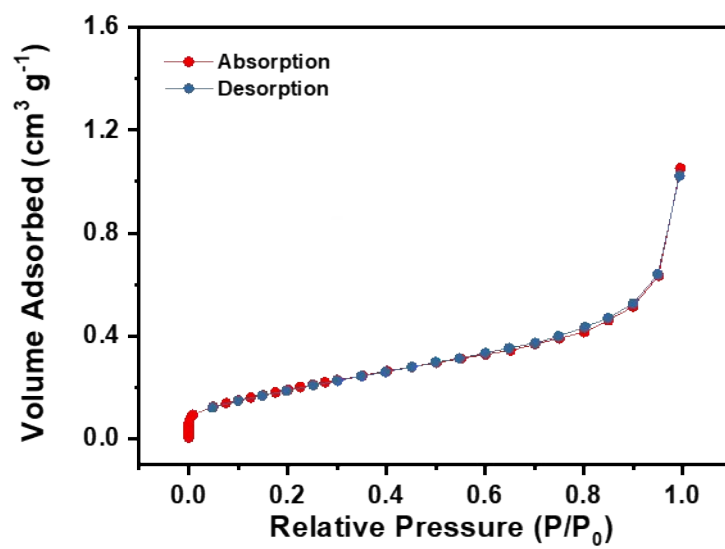

**Fig. S2** BET analysis of N<sub>2</sub> adsorption–desorption isotherm for NCM523.

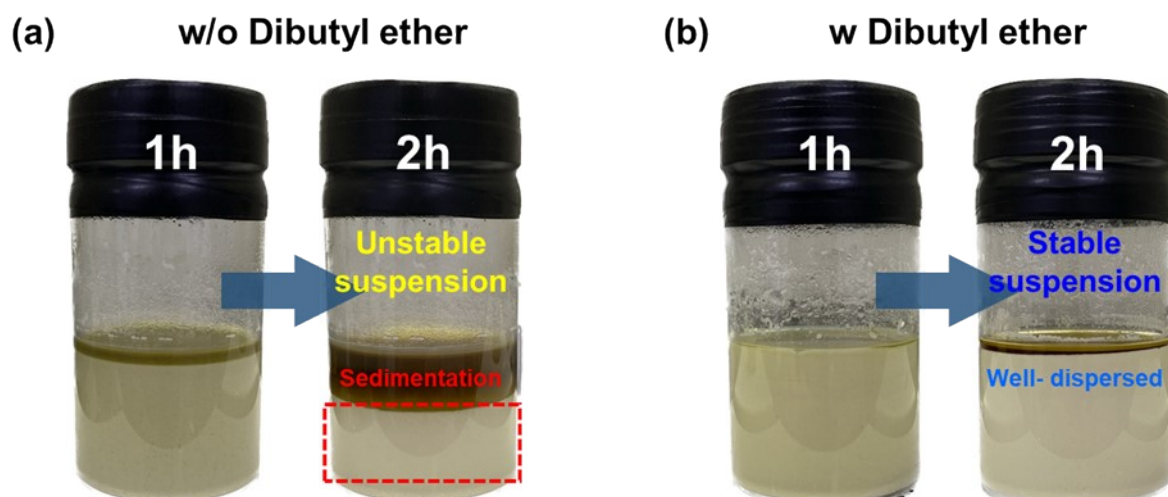

**Fig. S3** Results of liquid-phase synthesis of  $\text{Li}_6\text{PS}_5\text{Cl}$  precursors in solvent. Digital photographs of (a) without dibutyl ether and (b) with dibutyl ether (during synthesis without stirring).

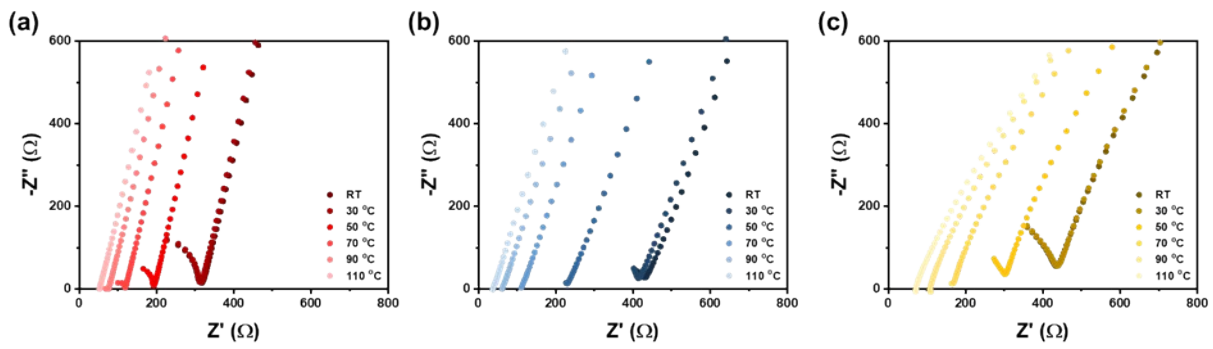

**Fig. S4** Nyquist plots of impedance spectra for (a) LPSCI\_BM, (b) LPSCI\_LP1, and (c) LPSCI\_LP2 with elevating temperature from RT to 110 °C at intervals of 20 °C.

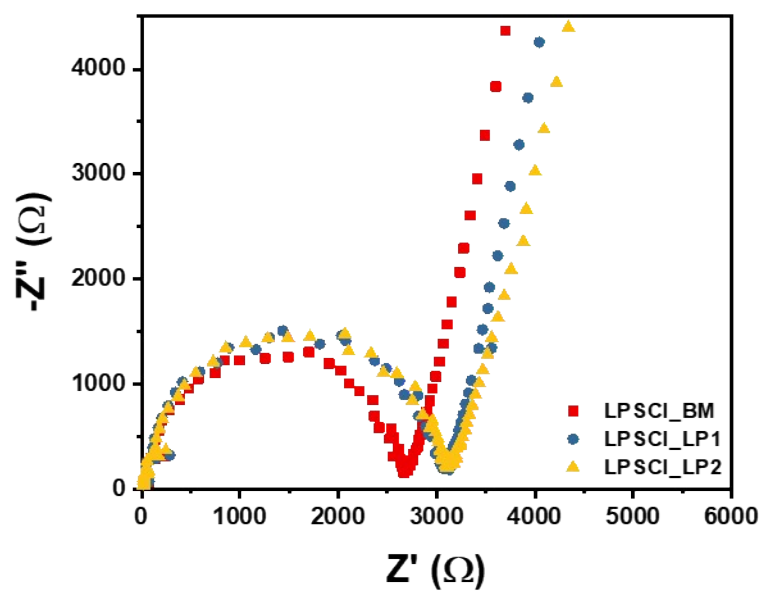

**Fig. S5** Nyquist plots of impedance spectra for (a) LPSCI\_BM, (b) LPSCI\_LP1, and (c) LPSCI\_LP2 with heat-treatment at 180 °C.

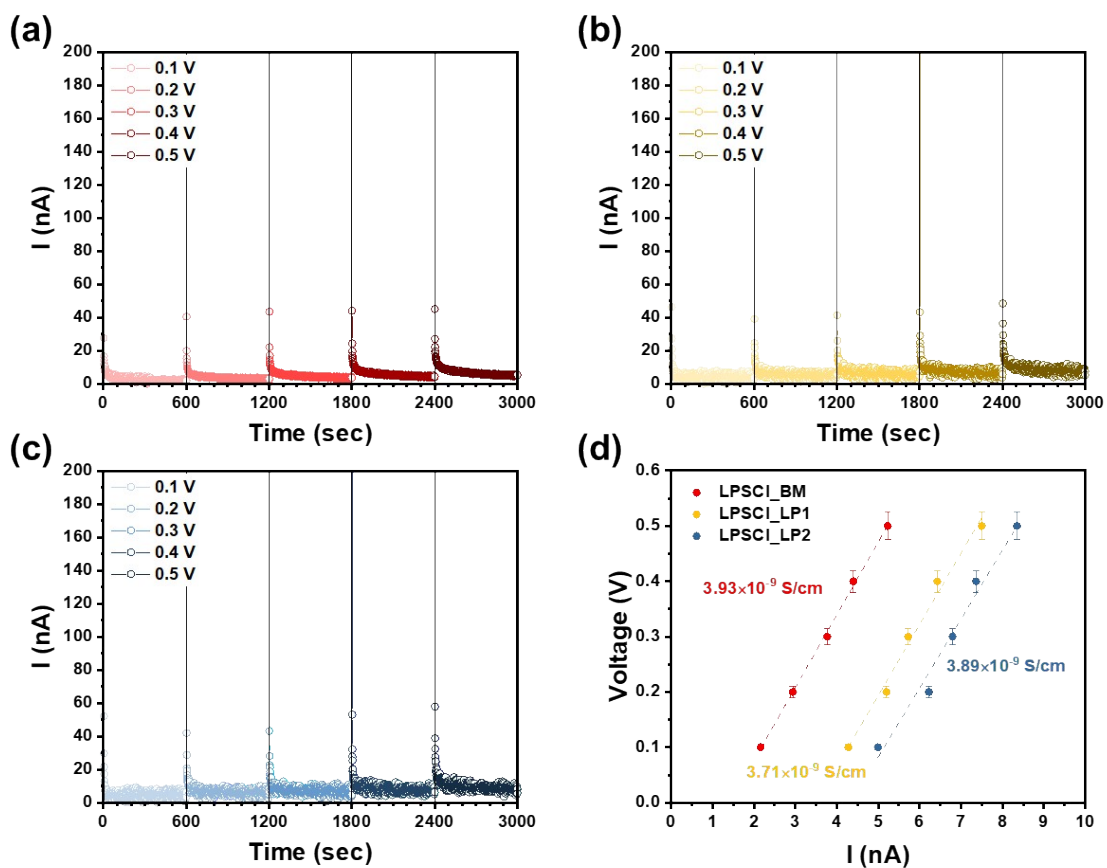

**Fig. S6** Chronoamperometry results of (a) LPSCI\_BM, (b) LPSCI\_LP1, and (c) LPSCI\_LP2 with an applied voltage of 0.1, 0.2, 0.3, 0.4, and 0.5 V. (d) Linear fits.

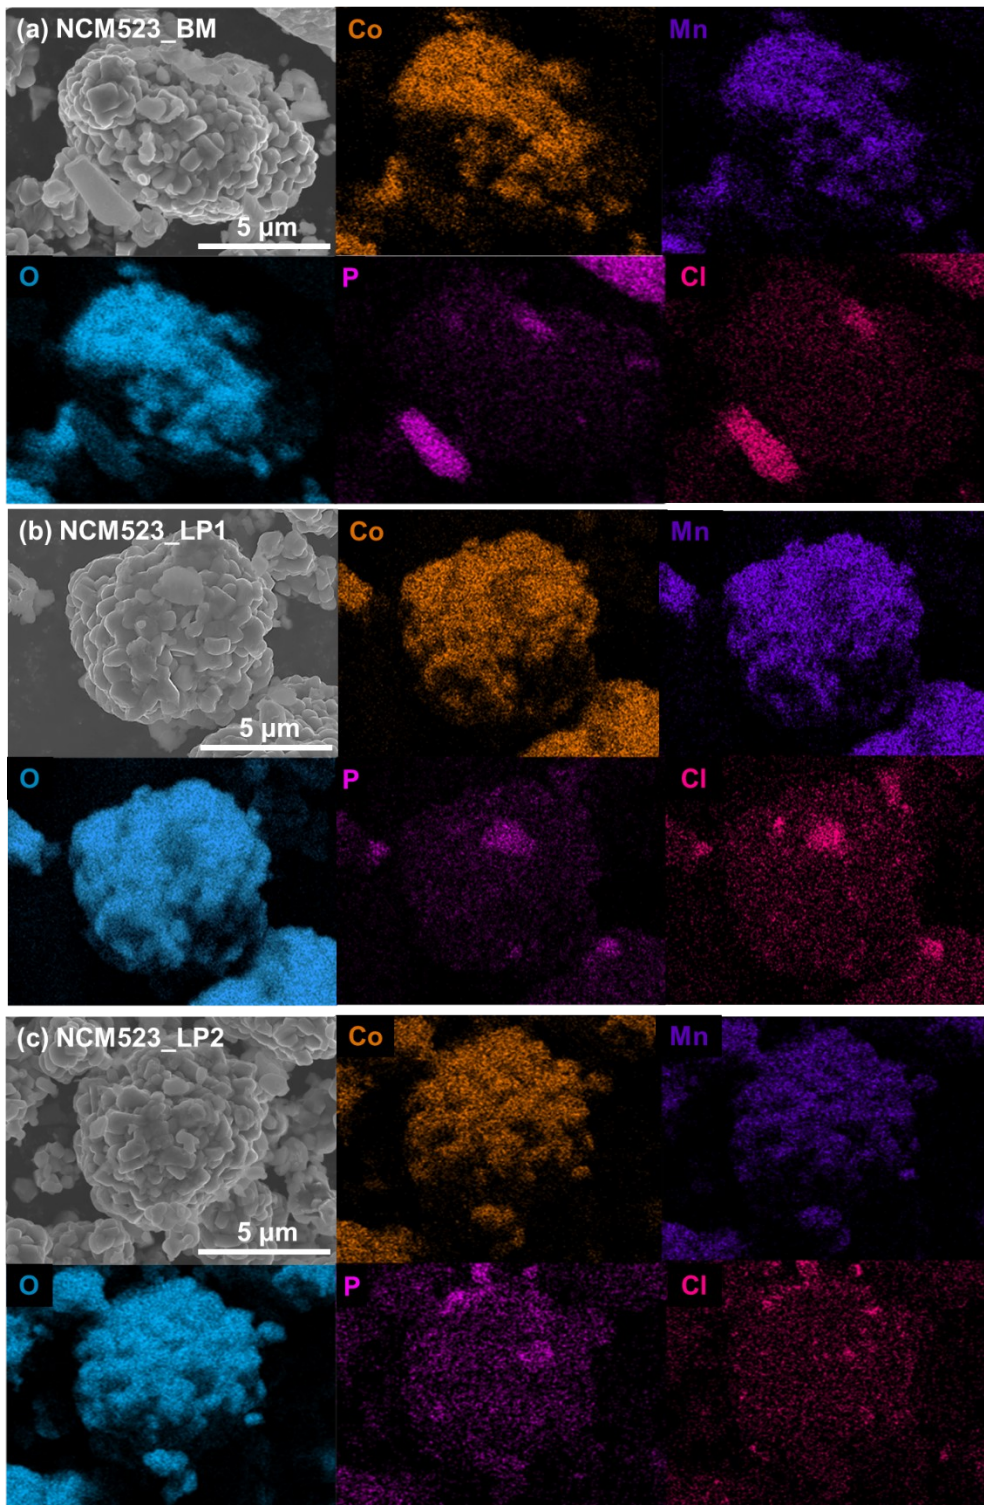

**Fig. S7** SEM images of (a) NCM523\_BM, (b) NCM523\_LP1, and (c) NCM523\_LP2 with corresponding EDS mapping of Co, Mn, O, P, and Cl.



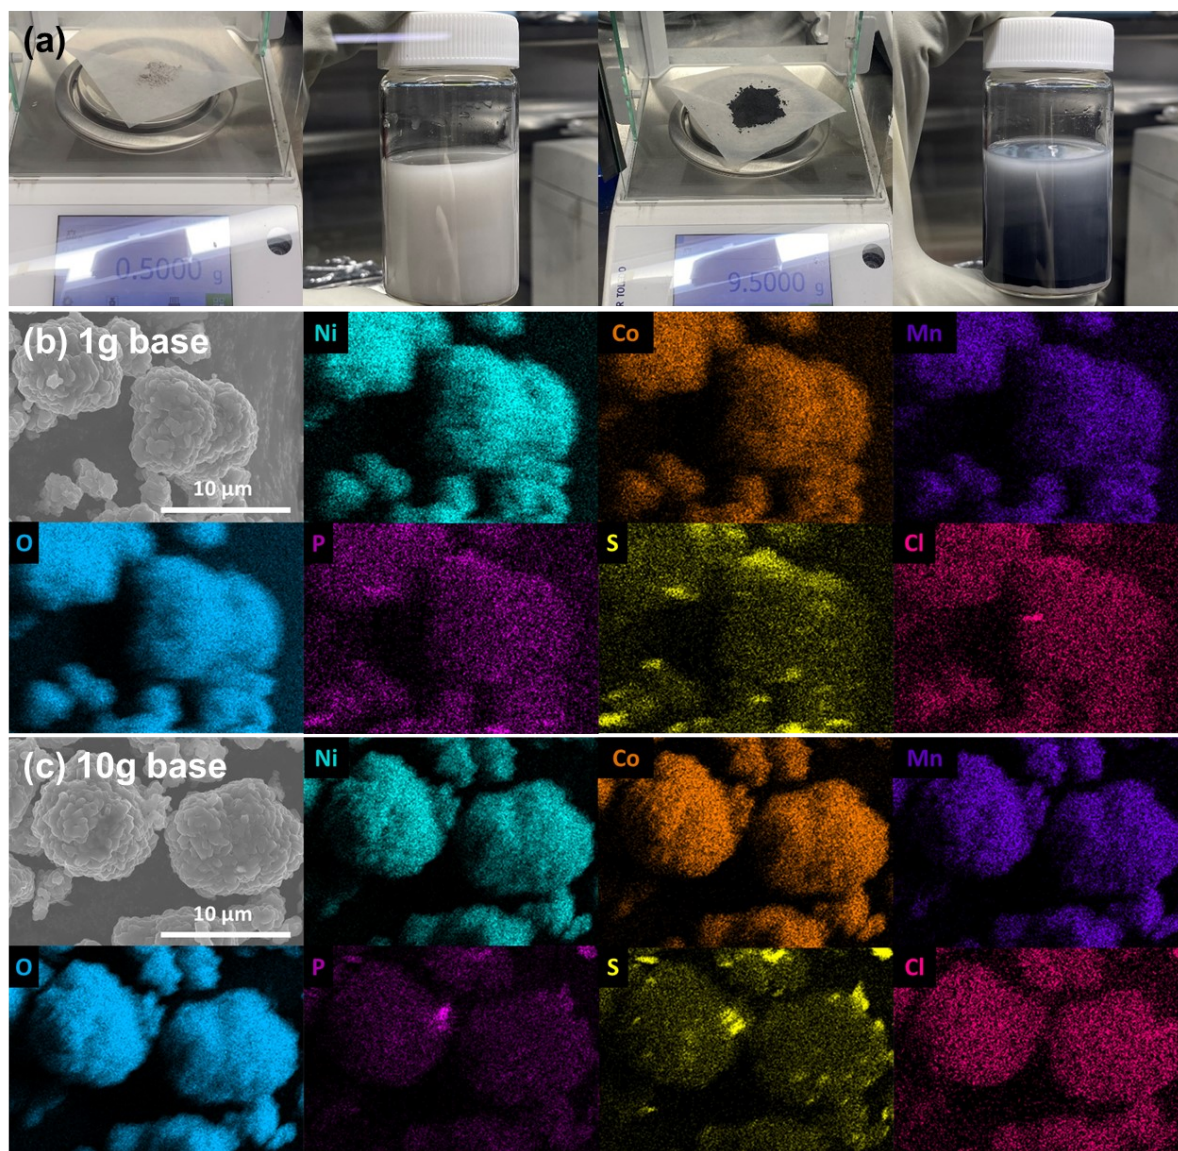

**Fig. S8** (a) Digital photograph of 10 g base coating process. SEM images of (b) 1 g base and (c) 10 g base of NCM523\_LP2 with corresponding EDS mapping of Ni, Co, Mn, O, P, S, and Cl.

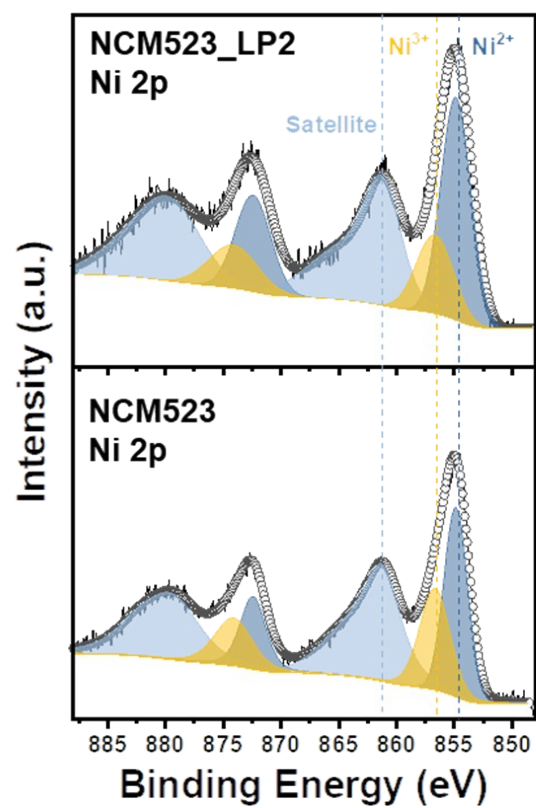

Fig. S9 Ni 2p XPS spectra of NCM523 and NCM523\_LP2.

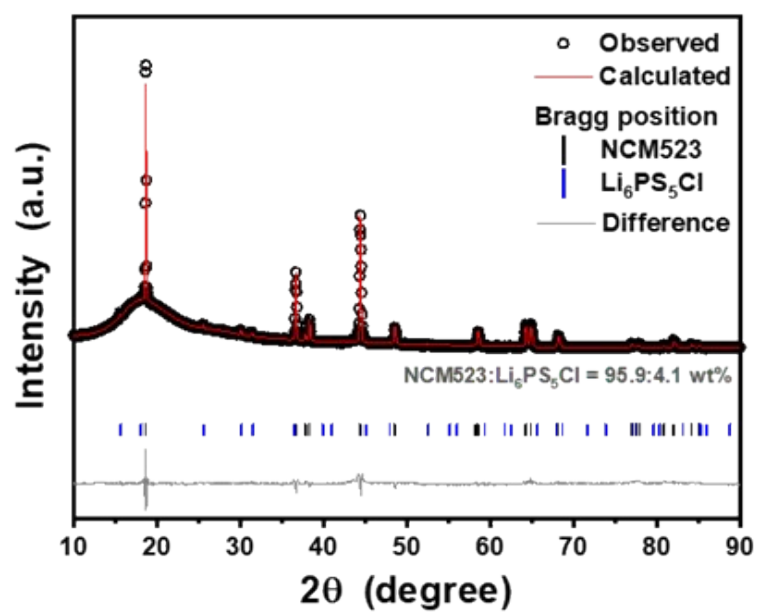

Fig. S10 Rietveld refinement results of the XRD patterns of NCM523\_LP2.

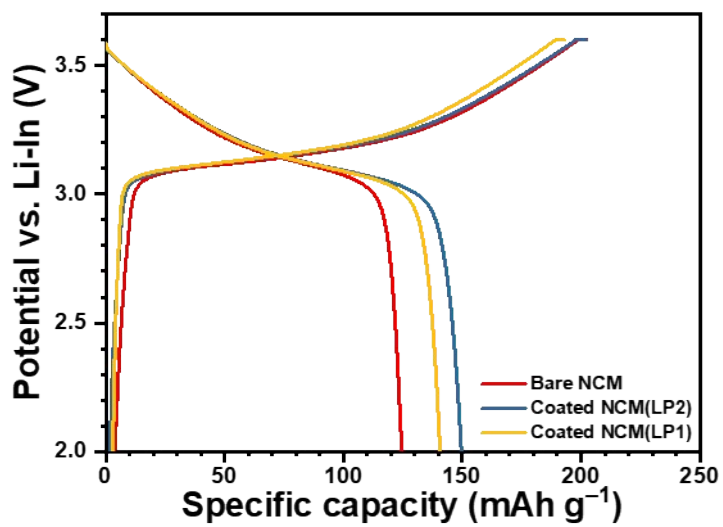

**Fig. S11** 1<sup>st</sup> charge–discharge voltage profiles of all-solid-state cells with composite cathode featuring NCM523, NCM523\_LP1, and NCM523\_LP2.

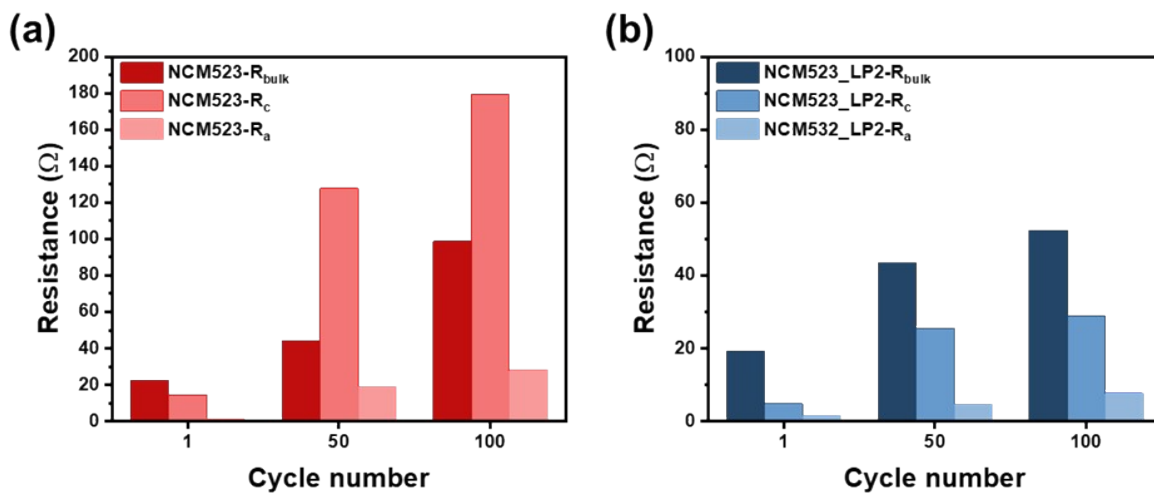

**Fig. S12** Fitted values for impedance spectra of all-solid-state cells with (a) NCM523, and (b) NCM523\_LP2 in Fig. 4e.

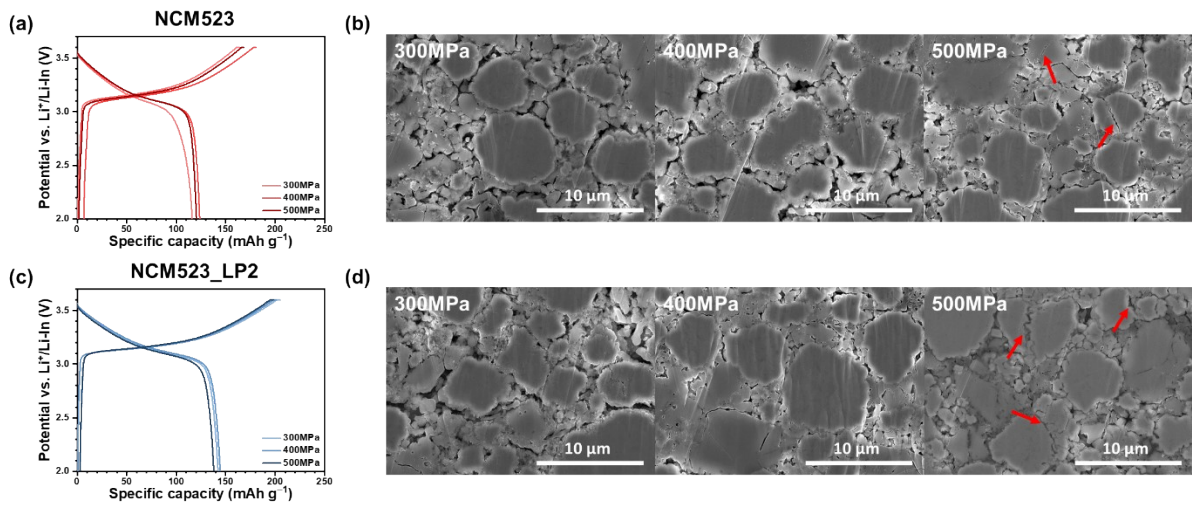

**Fig. S13** Electrochemical characterization of all-solid-state cells employing bare NCM523 and NCM523\_LP2 with variable fabrication pressure. (a, c) 1<sup>st</sup> charge–discharge voltage profiles. Cross-sectional SEM images of composite cathode with (b) NCM523, and (d) NCM523\_LP2 applying variable fabrication pressure. Red arrows indicate micro cracks in cathode active material.

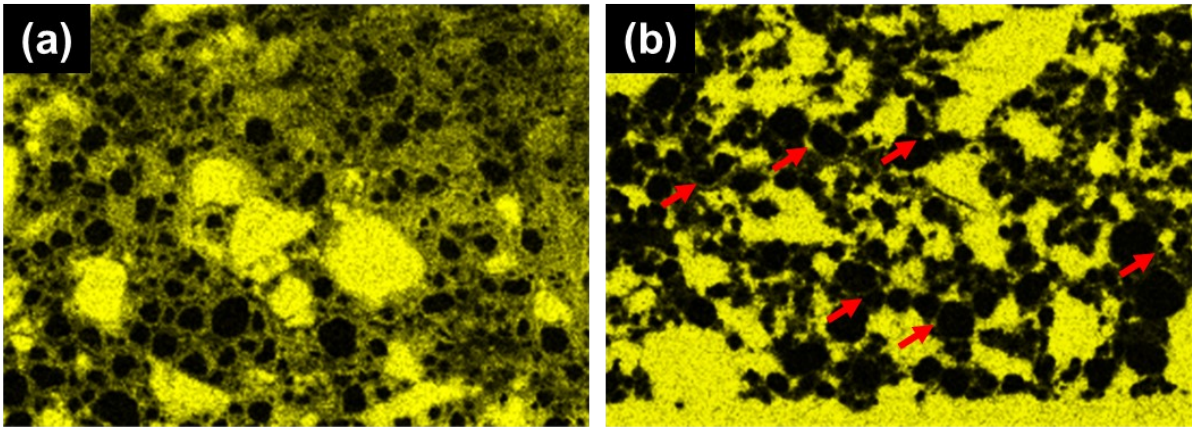

**Fig. S14** Corresponding EDS mapping of S in Fig. 5a and b. Pristine state of composite cathode with (a) NCM523, and (b) NCM523\_LP2. Red arrows indicate intimate contacts.
